# Supplementary material for: The diverse structures of Cd(ii) coordination polymers with 1,3,5-benzenetribenzoate tuned by organic bases
Source: Royal Society of Chemistry journal article supplement (doi:10.1039/c1ce05541k), 2011-01-01
Supplement: c1ce05541k.pdf [file c1ce05541k.pdf]

## Supporting Information for

# The diverse structures of Cd(II) coordination polymers with 1,3,5-benzenetricarboxate tuned by organic bases

Hua Xiang, Wen-Yang Gao, Di-Chang Zhong, Long Jiang,\* and Tong-Bu Lu\*

**Table S1** Selected bond lengths (Å) and angles (°) for **1-4<sup>a</sup>**.

| <b>1</b>            |           |                      |           |                     |           |
|---------------------|-----------|----------------------|-----------|---------------------|-----------|
| Cd(1)-O(1)          | 2.233(6)  | Cd(1)-O(3)#2         | 2.444(6)  | Cd(1)-O(4)#2        | 2.372(5)  |
| Cd(1)-O(5)#1        | 2.437(14) | Cd(1)-O(6)#1         | 2.304(15) | Cd(1)-O(7)          | 2.565(7)  |
| Cd(2)-O(2)          | 2.185(5)  | Cd(2)-O(4)#2         | 2.269(6)  | Cd(2)-O(7)          | 2.347(6)  |
| O(1)-Cd(1)-O(8)     | 87.7(7)   | O(1)-Cd(1)-O(6)#1    | 136.5(3)  | O(1)-Cd(1)-O(4)#2   | 95.0(2)   |
| O(1)-Cd(1)-O(5)#1   | 82.5(3)   | O(1)-Cd(1)-O(3)#2    | 148.2(2)  | O(1)-Cd(1)-O(7)     | 79.8(2)   |
| O(2)-Cd(2)-O(4)#4   | 94.8(2)   | O(2)-Cd(2)-O(4)#2    | 85.2(2)   | O(2)-Cd(2)-O(7)#3   | 86.4(2)   |
| O(2)-Cd(2)-O(7)     | 93.6(2)   | O(3)#2-Cd(1)-O(7)    | 97.1(2)   | O(4)#2-Cd(1)-O(7)   | 74.9(2)   |
| O(4)#2-Cd(2)-O(7)   | 98.8(2)   | O(4)#2-Cd(2)-O(7)    | 81.2(2)   | O(4)#2-Cd(1)-O(5)#1 | 162.1(4)  |
| O(4)#2-Cd(1)-O(3)#2 | 54.2(2)   | O(5)#1-Cd(1)-O(3)#2  | 129.2(3)  | O(5)#1-Cd(1)-O(7)   | 87.3(4)   |
| O(6)#1-Cd(1)-O(3)#2 | 75.0(3)   | O(6)#1-Cd(1)-O(5) #1 | 54.3(4)   | O(6)#1-Cd(1)-O(7)   | 92.2(4)   |
| O(6)#1-Cd(1)-O(4)#2 | 124.3(4)  | O(8)-Cd(1)-O(6)#1    | 97.3(8)   | O(8)-Cd(1)-O(4)#2   | 105.8(7)  |
| O(8)-Cd(1)-O(5)#1   | 91.8(8)   | O(8)-Cd(1)-O(3)#2    | 93.1(7)   | O(8)-Cd(1)-O(7)     | 167.5(7)  |
| <b>2</b>            |           |                      |           |                     |           |
| Cd(1)-O(1)          | 2.392(3)  | Cd(1)-O(2)           | 2.359(3)  | Cd(1)-O(3)#4        | 2.350(4)  |
| Cd(1)-O(4)#4        | 2.455(4)  | Cd(1)-O(5)#3         | 2.483(4)  | Cd(1)-O(6)#3        | 2.307(3)  |
| Cd(1)-N(1)          | 2.294(3)  |                      |           |                     |           |
| O(2)-Cd(1)-O(1)     | 54.84(11) | O(3)#4-Cd(1)-O(4)#4  | 54.07(12) | O(6)#3-Cd(1)-O(5)#3 | 54.65(13) |
| N(1)-Cd(1)-O(1)     | 85.70(12) | N(1)-Cd(1)-O(4)#4    | 92.79(16) | N(1)-Cd(1)-O(5)#3   | 86.53(13) |

3

|                       |           |                     |           |                      |           |
|-----------------------|-----------|---------------------|-----------|----------------------|-----------|
| Cd(1)-O(1)            | 2.335(3)  | Cd(1)-O(2)          | 2.337(2)  | Cd(1)-O(7)           | 2.518(3)  |
| Cd(1)-O(8)            | 2.319(3)  | Cd(2)-O(3)          | 2.285(3)  | Cd(2)-O(4)           | 2.519(3)  |
| Cd(1)-N(1)            | 2.337(3)  | Cd(1)-O(11)#2       | 2.492(3)  | Cd(1)-O(12)#2        | 2.317(3)  |
| Cd(2)-O(5)#4          | 2.406(3)  | Cd(2)-O(6)#4        | 2.336(3)  | Cd(2)-O(9)#1         | 2.378(3)  |
| Cd(2)-O(10)#1         | 2.479(3)  | Cd(2)-N(2)#3        | 2.324(3)  |                      |           |
| O(2)-Cd(1)-O(1)       | 55.81(10) | O(8)-Cd(1)-O(7)     | 53.68(10) | O(4)-Cd(2)-O(3)      | 53.94(10) |
| N(1)-Cd(1)-O(1)       | 89.11(11) | N(1)-Cd(1)-O(7)     | 86.06(11) | N(1)-Cd(1)-O(8)      | 99.23(13) |
| O(11)#2-Cd(1)-O(12)#2 | 54.54(10) | O(6)#4-Cd(2)-O(5)#4 | 55.10(10) | O(9)#1-Cd(2)-O(10)#1 | 53.77(11) |
| N(2)#3-Cd(2)-O(4)     | 84.72(11) | N(2)#3-Cd(2)-O(5)#4 | 85.17(11) | N(2)#3-Cd(2)-O(10)#1 | 85.77(12) |

4

|                     |          |                     |          |                   |          |
|---------------------|----------|---------------------|----------|-------------------|----------|
| Cd(1)-O(1)          | 2.458(7) | Cd(1)-O(2)          | 2.374(7) | Cd(1)-O(3)#2      | 2.403(7) |
| Cd(1)-O(4)#2        | 2.305(7) | Cd(1)-O(6)#1        | 2.250(6) | Cd(1)-N(1)        | 2.220(9) |
| Cd(2)-N(3)          | 2.338(9) | Cd(2)-N(5)          | 2.321(9) | Cd(2)-O(1W)       | 2.354(7) |
| O(2)-Cd(1)-O(1)     | 54.5(2)  | O(4)#2-Cd(1)-O(3)#2 | 55.7(2)  | O(6)#1-Cd(1)-O(1) | 86.2(2)  |
| O(6)#1-Cd(1)-O(3)#2 | 89.6(2)  | N(1)-Cd(1)-O(2)     | 95.3(3)  | N(1)-Cd(1)-O(4)#2 | 90.8(3)  |
| N(1)-Cd(1)-O(6)#1   | 107.7(3) | O(1W)-Cd(2)-O(1W)#3 | 177.6(3) | N(3)-Cd(2)-O(1W)  | 86.3(3)  |
| N(3)-Cd(2)-N(3)#3   | 85.3(4)  | N(5)-Cd(2)-O(1W)    | 88.7(3)  | N(5)-Cd(2)-N(3)   | 92.0(3)  |

Symmetry codes: #1  $x, y+1, z$ , #2  $x-1/2, y+1/2, z$ , #3  $-x+3/2, -y+3/2, -z+1$ , #4  $-x+2, -y+1, -z+1$ , for **1**; #1  $-x+3/2, y-1/2, -z+3/2$ , #2  $-x+1/2, y-1/2, -z+1/2$ , #3  $-x+1/2, y+1/2, -z+1/2$ , #4  $-x+3/2, y+1/2, -z+3/2$ , for **2**; #1  $-x+1, y+1/2, -z+1/2$ , #2  $-x+1, y-1/2, -z+1/2$ , #3  $-x, -y+1, -z$ , #4  $-x, y+1/2, -z-3/2$ , for **3**; #1  $-x, y-1/2, -z-3/2$ , #2  $-x+1, y+1/2, -z+1/2$ , #3  $-x+1, y-1/2, -z+1/2$ , #4  $-x, -y+1, -z$ , #5  $-x, y+1/2, -z-3/2$ , for **4**.

(a)

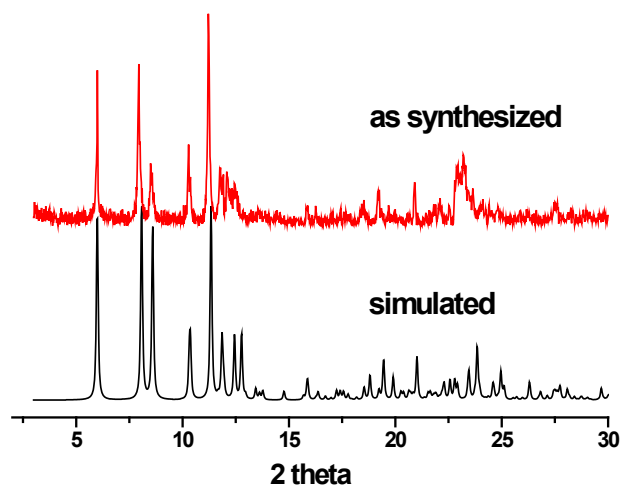

(b)

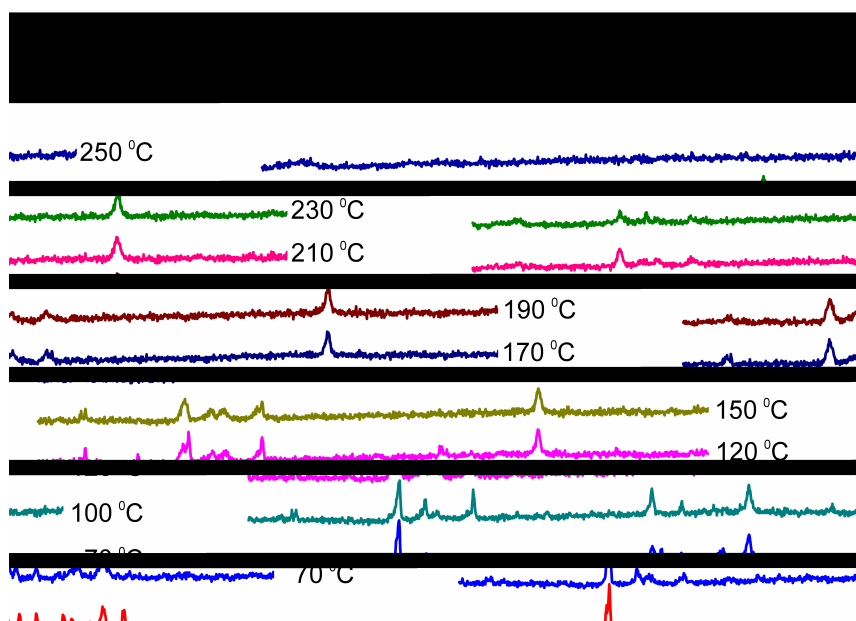

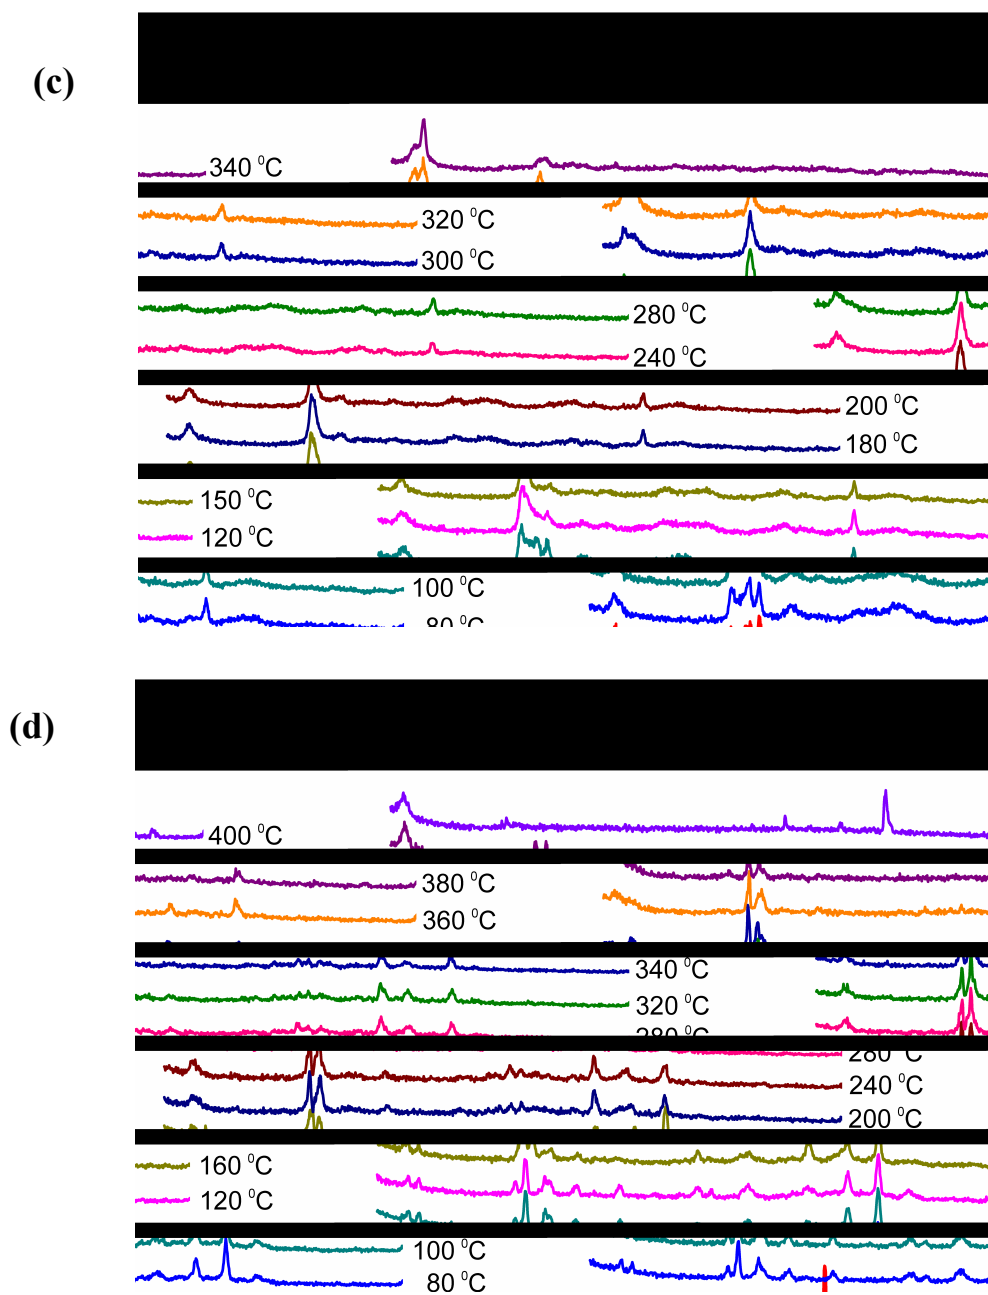

**Fig. S1** The XPRD pattern for **1** (a), and the variable temperature PXRD patterns for **2** (b), **3** (c), and **4** (d), respectively.

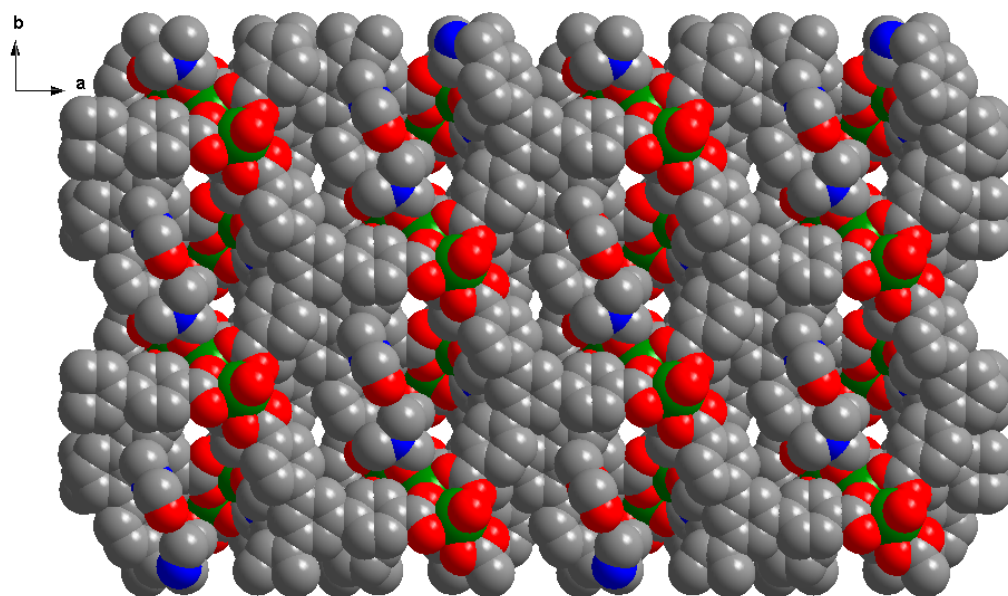

**Fig. S2** The 3D structure of **1**, showing there is almost no pores.

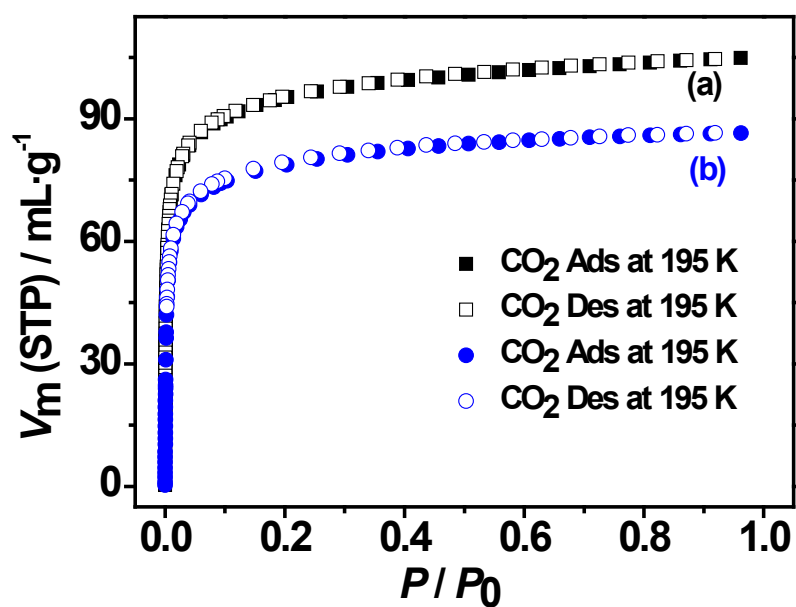

**Fig. S3** The gas sorption isotherms of CO<sub>2</sub> for desolvated **3** degassed at 513 K (a) and 383 K (b), respectively.

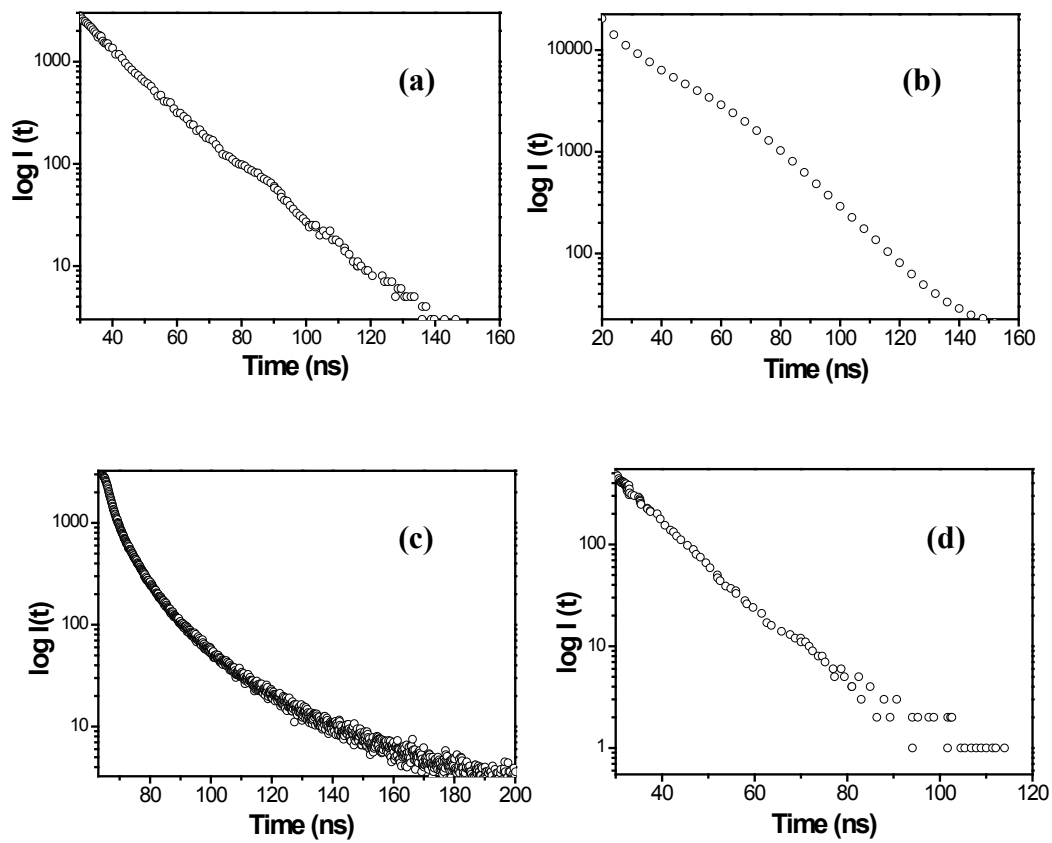

**Fig. S4** The Emission decay patterns for **1** (a), **2** (b), **3** (c) and **4** (d).
